# Supplementary material for: Silicon micron cages derived from a halloysite nanotube precursor and aluminum sacrificial template in molten AlCl3 as an anode for lithium-ion batteries
Source: Royal Society of Chemistry journal article supplement (doi:10.1039/d2ra01394k), 2022-01-01
Supplement: d2ra01394k1.pdf [file d2ra01394k1.pdf]

Table S1. The LIB electrochemical performance comparison of reported silicon anode materials with different nanostructure.

| Anodes                  | Structure                                                            | Current density       | Capacity<br>(mAh g <sup>-1</sup> ) | After<br>cycles | Ref       |
|-------------------------|----------------------------------------------------------------------|-----------------------|------------------------------------|-----------------|-----------|
| <b>SMCs</b>             | Silicon micron cages                                                 | 1 A g <sup>-1</sup>   | 1035.1                             | 300             | This work |
| <b>H-Si</b>             | Si nanoparticles                                                     | 0.2 C                 | 839                                | 1000            | 9         |
| <b>Si frameworks</b>    | (3D-interconnected) Si frameworks                                    | 2 A g <sup>-1</sup>   | 970                                | 500             | 11        |
| <b>SNRs</b>             | Silicon nanorods                                                     | 5.0 A g <sup>-1</sup> | 816                                | 500             | 7         |
| <b>pSi/C</b>            | Nanosheets                                                           | 4 A g <sup>-1</sup>   | 1313.5                             | 500             | 6         |
| <b>D-Si-6</b>           | Si nanoparticles                                                     | 0.2 C                 | 970                                | 500             | 8         |
| <b>Si nanoparticles</b> | Si nanoparticles                                                     | 3 A g <sup>-1</sup>   | 870                                | 1000            | 15        |
| <b>PSi/SCNT-SRGO</b>    | weave cage-like carbon wrapped<br>mesoporous silicon                 | 1 A g <sup>-1</sup>   | 1008                               | 600             | 22        |
| <b>SC-NF</b>            | Nanoscale Silicon inside Carbon Fiber                                | 0.5 A g <sup>-1</sup> | 720                                | 200             | 23        |
| <b>Si/p-NC/CNTs</b>     | Si embedded porous N-doped carbon<br>combining with carbon nanotubes | 0.3 A g <sup>-1</sup> | 1126.3                             | 100             | 24        |
